# Supplementary material for: Urinary Untargeted Metabolic Profile Differentiates Children with Autism from Their Unaffected Siblings
Source: MDPI journal article supplement (doi:10.3390/metabo12090797), 2022-08-26
Supplement: s1 [file s1]

**Table S1.** Demographic characteristics of the sample (N=14 ASD and 14 unaffected siblings) and main clinical features of the 14 children with ASD.

|                                                   |                              | N        | Mean/Median (range) or % |
|---------------------------------------------------|------------------------------|----------|--------------------------|
| <i>Age in yrs</i><br>( <i>mean</i> ± <i>SEM</i> ) | - <i>ASD</i>                 | 14       | 7.06 ± 0.96 (3.2-15.6)   |
|                                                   | - <i>Unaffected siblings</i> | 14       | 6.68 ± 1.28 (1.0-14.0)   |
| <i>Gender:</i>                                    | <i>Male</i>                  | 11 pairs | 78.6%                    |
|                                                   | <i>Female</i>                | 3 pairs  | 21.4%                    |
|                                                   | <i>M/F ratio</i>             |          | 3.7 : 1                  |
| <i>I.Q.</i>                                       | <i>mean</i> ± <i>SEM</i>     | 13*      | 64.7± 6.78 (30-104)      |
|                                                   | >70                          | 7        | 50.0%                    |
|                                                   | ≤ 70                         | 7        | 50.0%                    |
| <i>DSM-IV Diagnosis:</i>                          | <i>Autistic Disorder</i>     | 10       | 71.5%                    |
|                                                   | <i>Asperger Syndrome</i>     | 1        | 7.1%                     |
|                                                   | <i>PDD-NOS</i>               | 3        | 21.4%                    |
| <i>Level of expressive language</i>               | <i>Sentences</i>             | 3        | 21.4%                    |
|                                                   | <i>Words</i>                 | 7        | 50.0%                    |
|                                                   | <i>Non-verbal</i>            | 4        | 28.6%                    |
| <i>Median VABS scores:</i>                        |                              |          |                          |
|                                                   | <i>Communication</i>         | 12       | 73.5 (31-115)            |
|                                                   | <i>Daily living skills</i>   | 12       | 78.5 (48-113)            |
|                                                   | <i>Socialization</i>         | 12       | 73.0 (55-116)            |
|                                                   | <i>Motor skills</i>          | 8        | 87.5 (56-111)            |
|                                                   | <i>Composite</i>             | 12       | 73.5 (47-115)            |

\*One ASD patient with intellectual disability was not testable.

Abbreviations: IQ. intellectual quotient; PDD-NOS. Pervasive Developmental Disorder – Not Otherwise Specified; SEM. standard error of the mean; VABS. Vineland Adaptive Behavior Scales.
